# Supplementary material for: Generation of an In Vitro Cartilage Aging Model Using Human Sera from Old Donors
Source: MDPI journal article supplement (doi:10.3390/bioengineering12080823), 2025-07-30
Supplement: s1 [file bioengineering-3654348-supplementary.pdf › bioengineering-3654348-supplementary.pdf]

**Table S1. Primer sequences for qRT-PCR**

| Gene          | Forward Primer (5'->3')  | Reverse Primer (5'->3')    |
|---------------|--------------------------|----------------------------|
| <i>RPL13a</i> | GCCATCGTGGCTAAACAGGTA    | GTTGGTGTTTCATCCGCTTGC      |
| <i>SOX9</i>   | GGCGGAGGAAGTCGGTGAAGAA   | GCTCATGCCGGAGGAGGAGTGT     |
| <i>COL1</i>   | GAGGGCCAAGACGAGGACATC    | CAGATCACGTCATCGCACAAAC     |
| <i>COL2</i>   | GGATGGCTGCACGAAACATACCGG | CAAGAAGAGACCGGCCCTATG      |
| <i>ACAN</i>   | AGTCACACCTGAGCAGCATC     | AGTTCTCAAATTGCATGGGGTGTC   |
| <i>VCAN</i>   | TGGAATGATGTTCCCTGCAA     | AAGGTCTTGGCATTCTTCTACAACAG |
| <i>IL-6</i>   | ACTCACCTCTTCAGAACGAATTG  | CCATCTTTGGAAGGTTTCAGGTTG   |
| <i>IL-8</i>   | TTTTGCCAAGGAGTGCTAAAGA   | AACCCTCTGCACCCAGTTTTC      |
| <i>MMP-3</i>  | CGGTTCCGCCTGTCTCAAG      | CGCCAAAAGTGCCTGTCTT        |
| <i>MMP-13</i> | ACTGAGAGGCTCCGAGAAATG    | GAACCCCGCATCTTGGCTT        |
| <i>CDKNA1</i> | AGTGGAATTAGCCCTCAGCA     | CATGGTCCCTGGGTTCTTC        |
| <i>GATA4</i>  | CAGTCTACGTGCCACACC       | TCCCGCCTGGCTCCAT           |

\*

**Table S2. All antibodies used in this study.**

| Antibody                                  | Company | Catalog No. | Dilution |
|-------------------------------------------|---------|-------------|----------|
| Collagen Type II                          | Abcam   | AB34712     | 1:500    |
| Ki67 (Kiel-67)                            | Abcam   | AB92742     | 1:250    |
| p21 (cyclin-dependent kinase inhibitor 1) | Novus   | NB100-1941  | 1:500    |

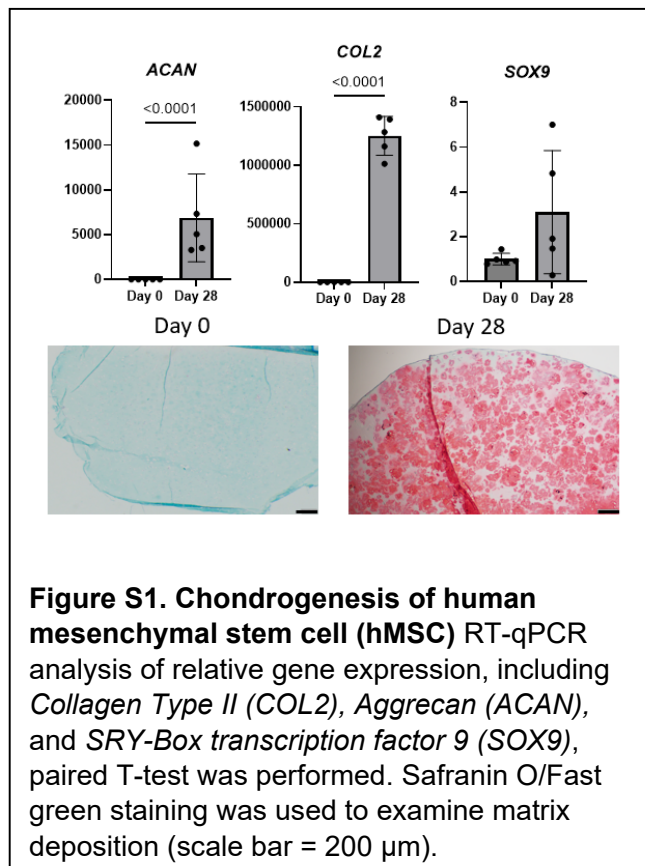

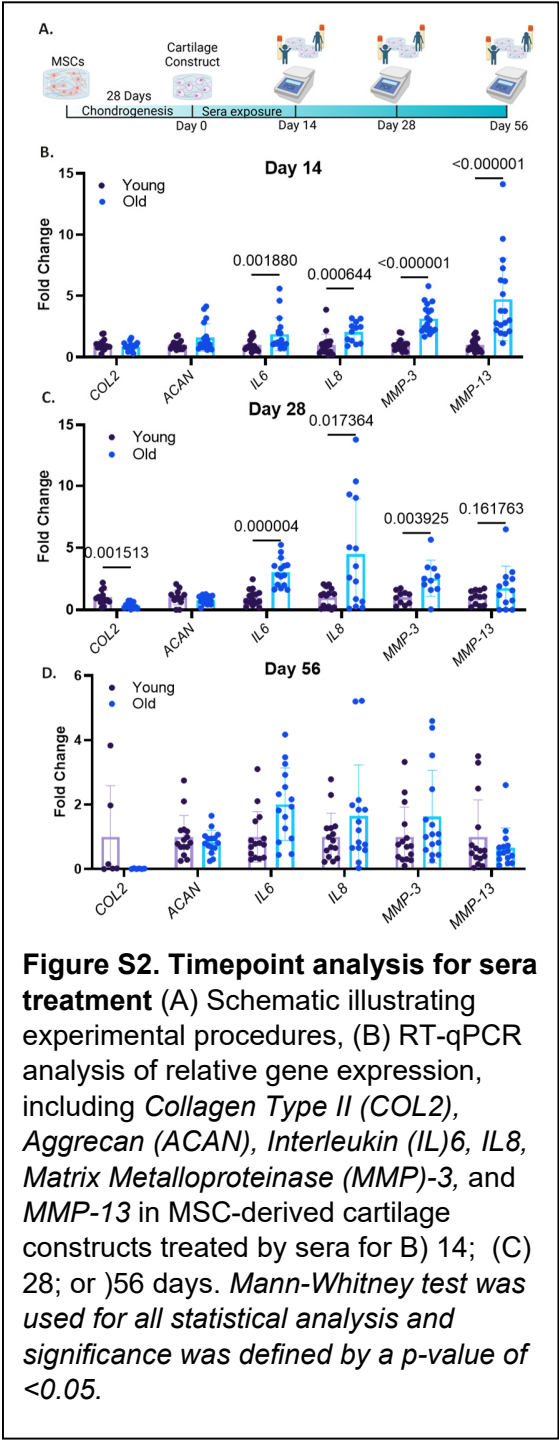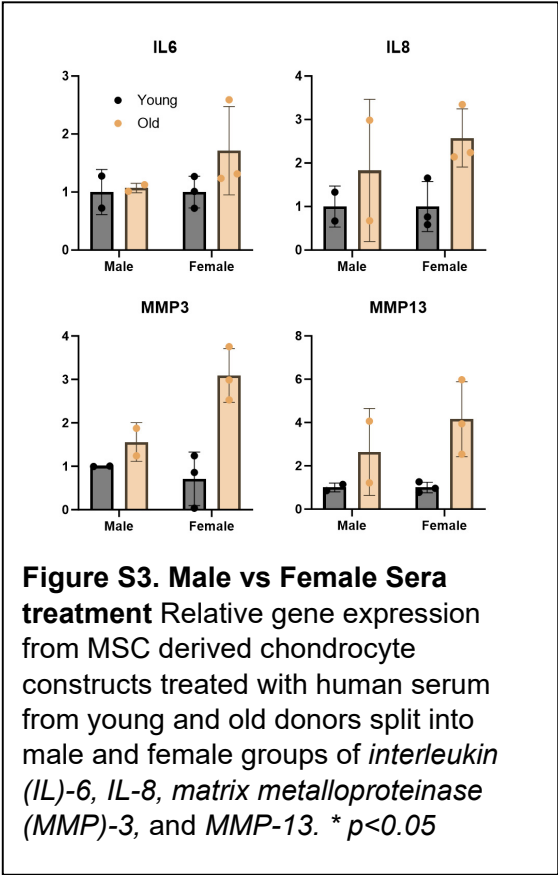

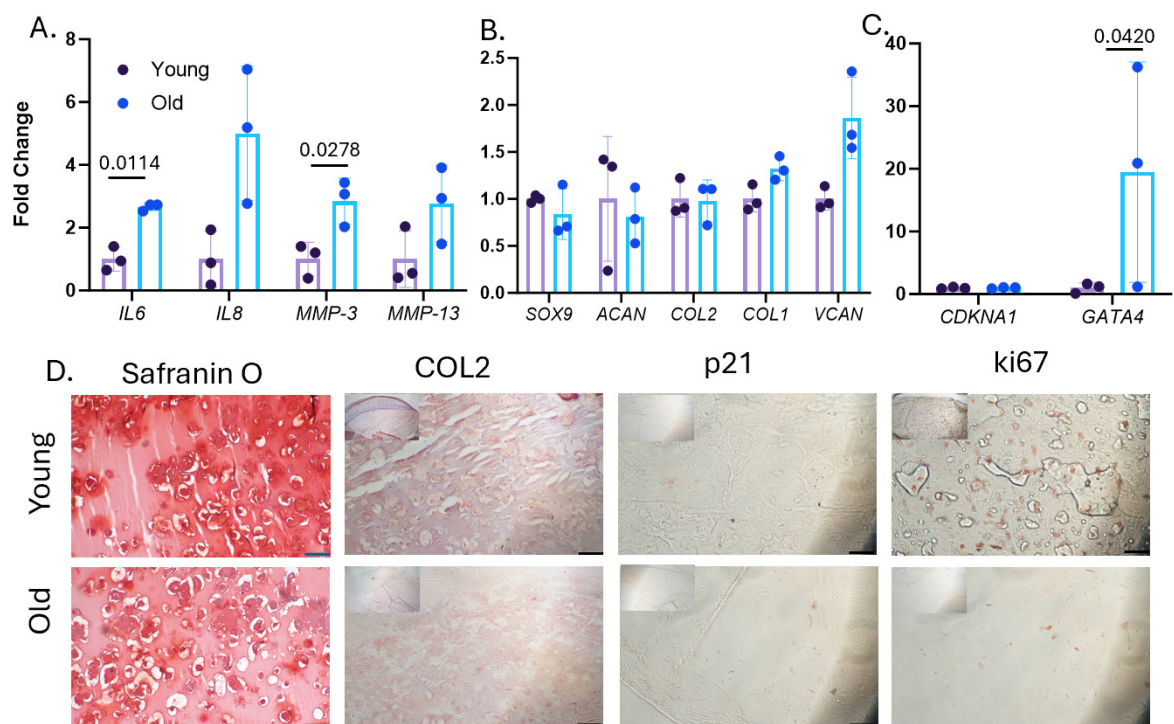

**Figure S4. Validation in the second MSC pool.** (A)Relative gene expression of inflammatory genes, interleukin (IL-6), IL-8, matrix metalloproteinase (MMP)– 3, and MMP-13. (B) Relative gene expression of chondrogenic genes, SRY-Box transcription factor (SOX)9, aggrecan (ACAN), and collagen type 2 (COL2), COL1, and versican (VCAN). (C)Relative gene expression of age-related genes, p21 and GATA4. (D)Safranin O staining, collagen 2 (COL2) immunohistochemistry (IHC) (Scalebar = 100  $\mu$ m), p21 IHC and Ki67 IHC (Scalebar = 50  $\mu$ m). The donor information was shown below.

|     |    |    |    |    |    |    |    |    |    |    |    |    |
|-----|----|----|----|----|----|----|----|----|----|----|----|----|
| Age | 31 | 26 | 17 | 19 | 31 | 25 | 72 | 71 | 78 | 77 | 77 | 84 |
| Sex | F  | F  | F  | M  | M  | M  | F  | F  | F  | M  | M  | M  |
